# Supplementary material
Source: publisher figshare collection journal article supplement (https://gsajournals.figshare.com/articles/dataset/_/13245053)
Supplement: Supplementary file 1 [file 1]

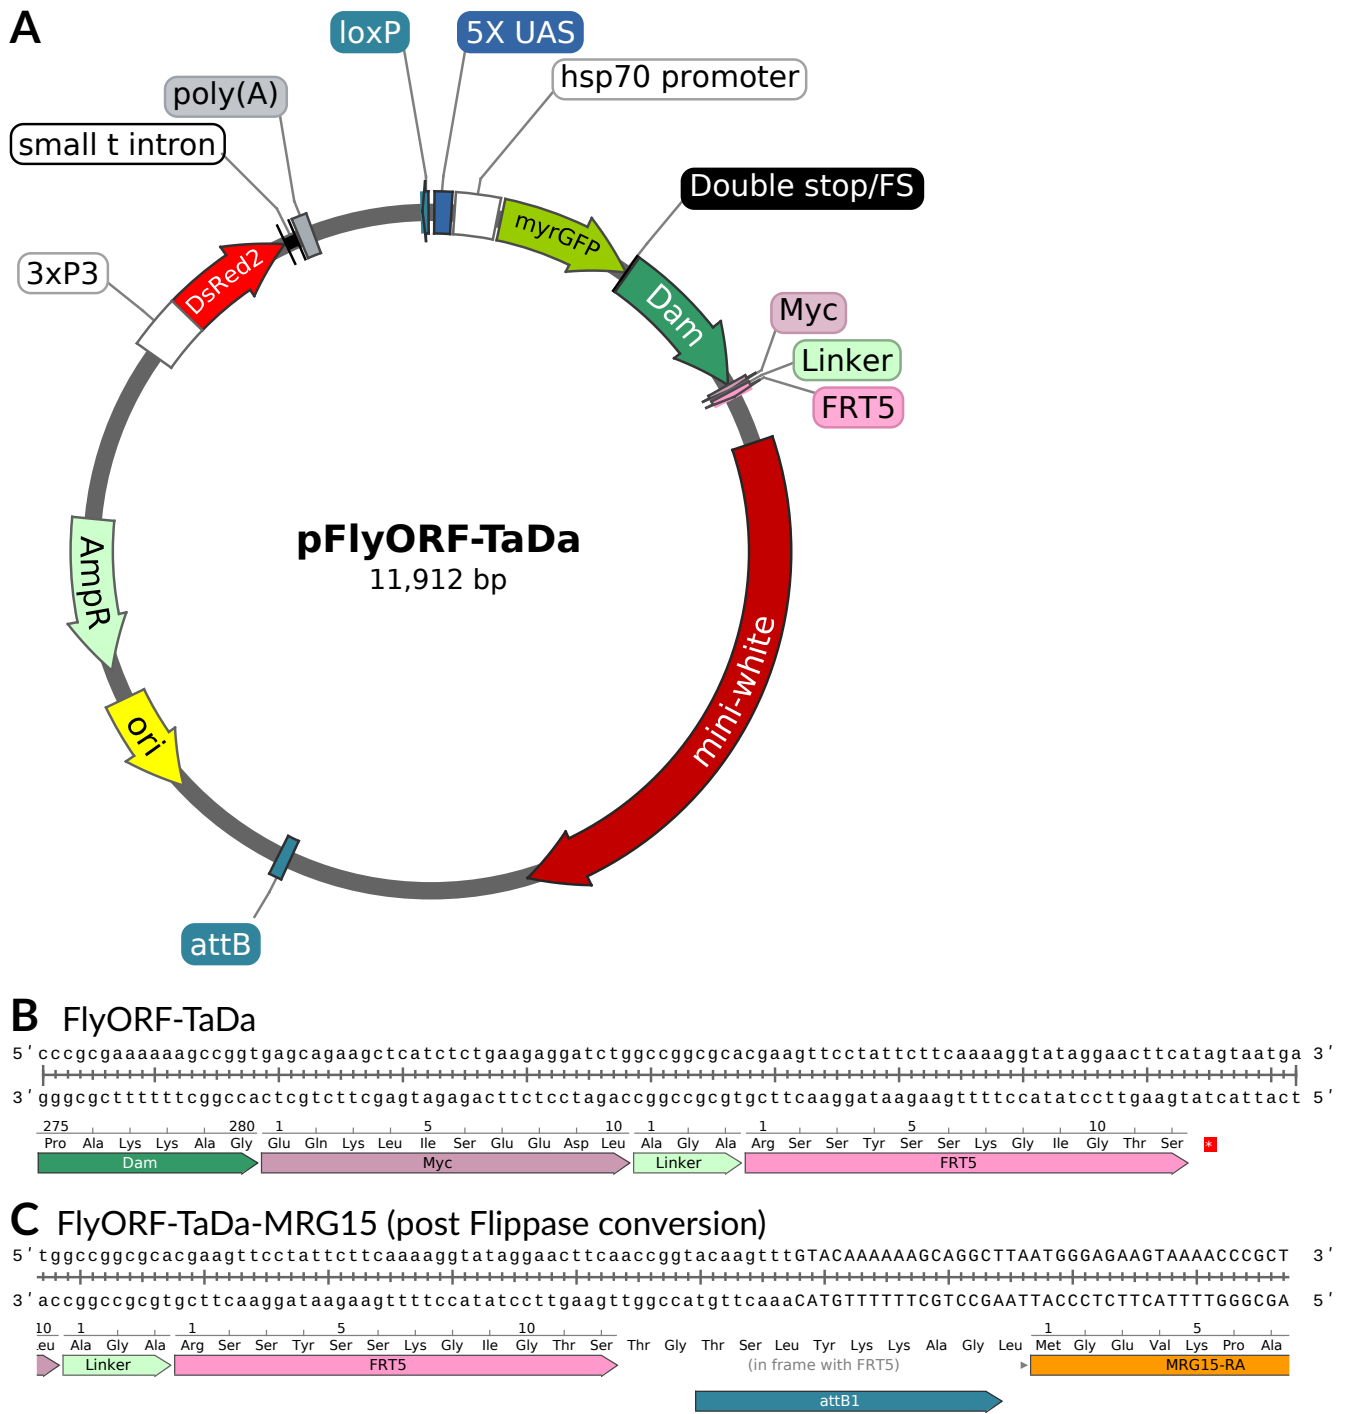

**Figure S1.** Maps of the pFlyORF-TaDa plasmid and converted genomic sequence. (A) Overall plasmid map schematic, with all relevant elements illustrated. (B) DNA sequence and in-frame translation of the linker region following Dam in the FlyORF-TaDa line; the STOP codon after the FRT5 site is marked with an asterisk. (C) Genomic sequence following Flippase-mediated conversion of the FlyORF-TaDa donor line to FlyORF-TaDa-MRG15. The attB1 site is the residual site from Gateway cloning of the original FlyORF library (and not to be confused with the attB integration site in the pFlyORF-TaDa vector).
