# Supplementary material
Source: publisher figshare collection journal article supplement (https://gsajournals.figshare.com/articles/dataset/_/13245053)
Supplement: Supplementary file 2 [file 1]

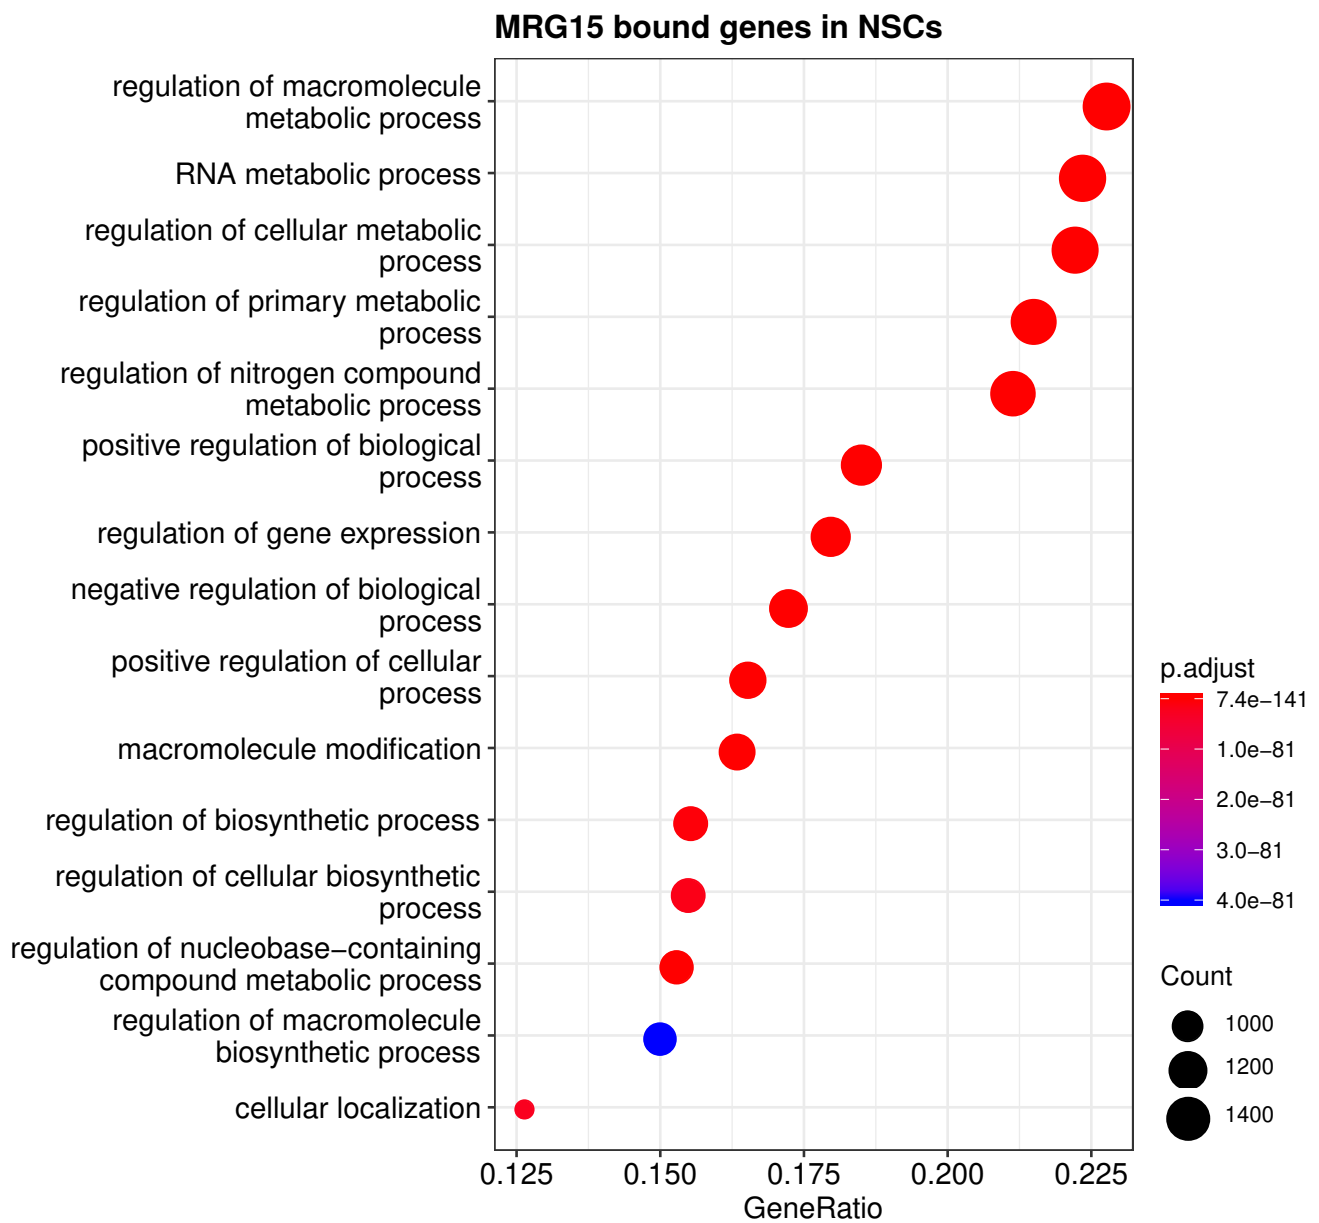

**Figure S4.** Gene Ontology (GO) term enrichment for genes covering MRG15 bound peaks in NSCs, with terms limited to 2000 genes.
