# Supplementary material
Source: publisher figshare collection journal article supplement (https://gsajournals.figshare.com/articles/dataset/_/13245053)
Supplement: Supplementary file 4 [file 1]

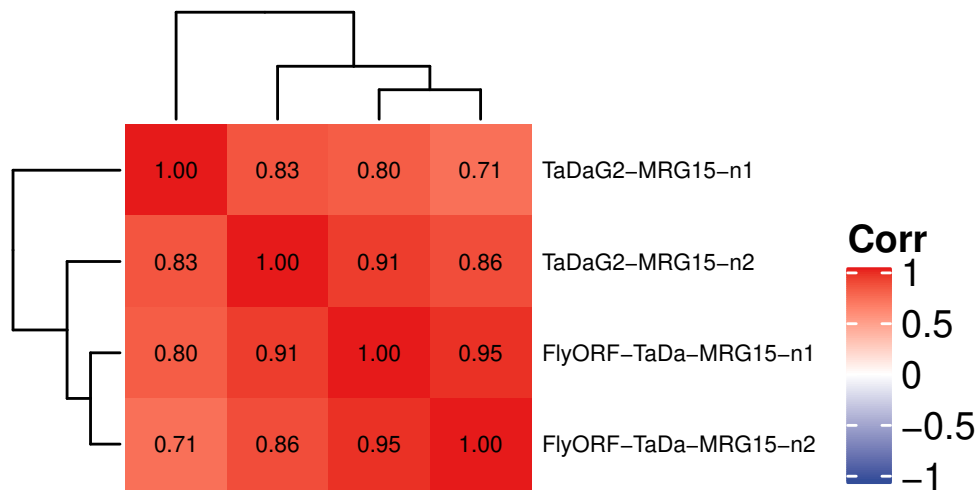

**Figure S3.** Correlation between individual replicates of MRG15 binding in NSCs acquired using either the conventional TaDa (TaDaG2) or FlyORF-TaDa. Pearson's correlation is shown.
